# Supplementary material for: Tag-based next generation sequencing: a feasible and reliable assay for EGFR T790M mutation detection in circulating tumor DNA of non small cell lung cancer patients
Source: PubMed Central journal article supplement (PMC6487061; doi:10.1186/s10020-019-0082-5), 2019-04-27
Supplement: 10020_2019_82_MOESM7_ESM.pdf [file 10020_2019_82_MOESM7_ESM.pdf]

**Additional file 7: Figure S3** Integrative Genomic Viewer visualization of C797S and C797G resistance mutations in cis configuration with T790M in patients 24 and 35

**patient 24**

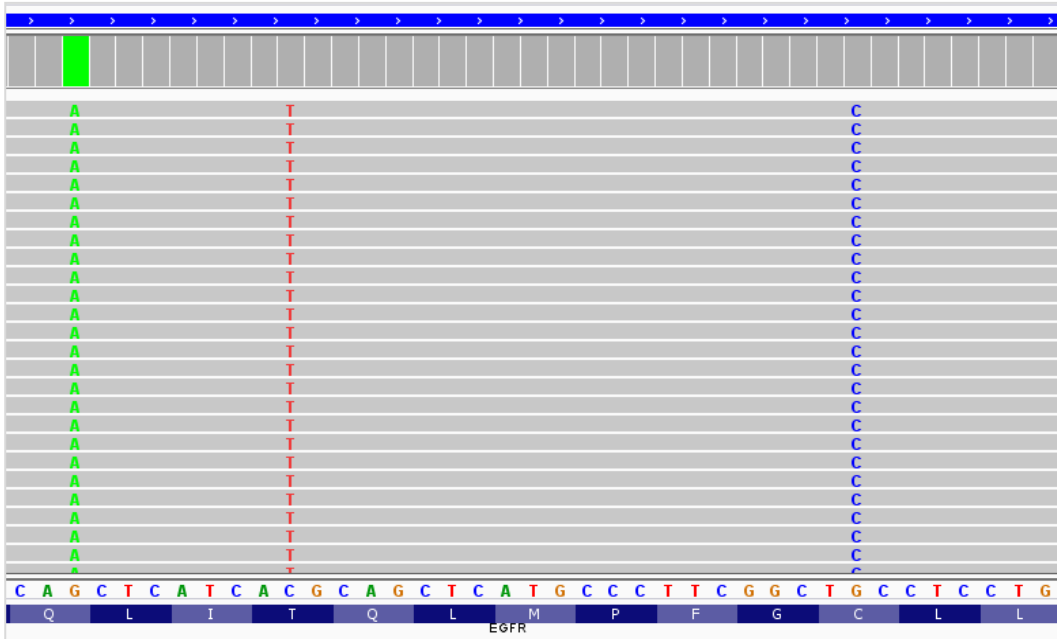

**patient 35**

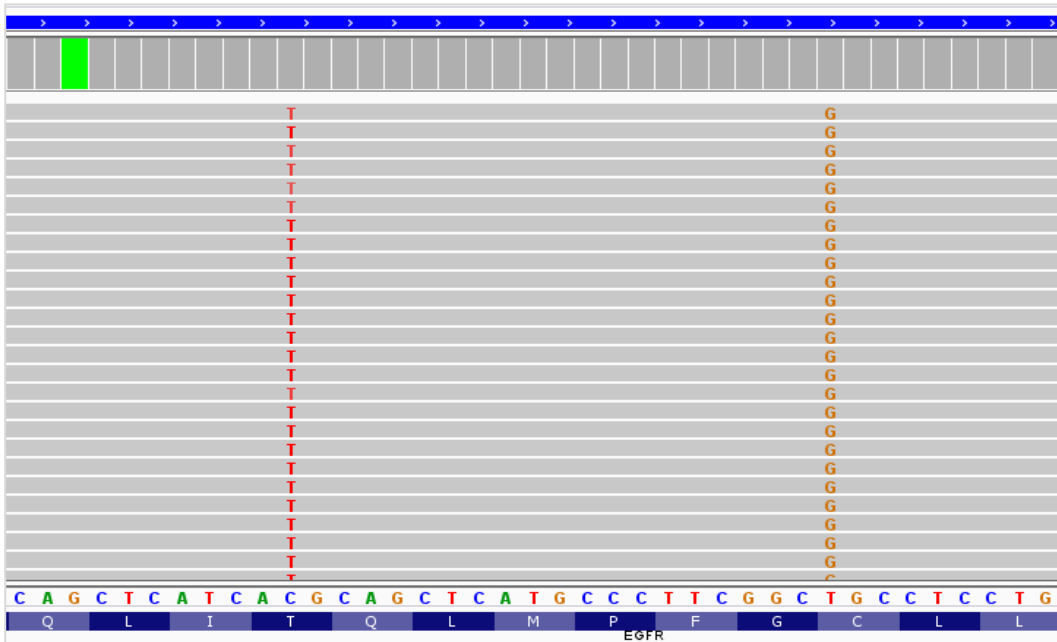

Deep sequencing data on the two patients showing the *EGFR* T790M and C797X mutation detected in cis allelic relationship
